# Supplementary material
Source: PubMed Central journal article supplement (PMC2867875)
Supplement: 0906232107_pnas.200906232SI.pdf [file 0906232107_pnas.200906232SI.pdf]

# Supporting Information

Gauthier et al. 10.1073/pnas.0906232107

**Table S1. Relevant clinical information for the 185 schizophrenia probands used in the present study**

| Subjects | Sex | Diagnosis              | AO | IQ               | ASQ score | ASD traits | Notes                                                                                                                                  |
|----------|-----|------------------------|----|------------------|-----------|------------|----------------------------------------------------------------------------------------------------------------------------------------|
| S00146   | M   | SCZ                    | 11 | 101              | 14        |            |                                                                                                                                        |
| S00149   | F   | SCZ                    | 10 | 81               | 3         | 0          |                                                                                                                                        |
| S00150   | M   | SCZ                    | 11 | 98               | 11        | 0          |                                                                                                                                        |
| S00152   | F   | SCZ                    | 11 | 71               | 10        | 0          |                                                                                                                                        |
| S00154   | M   | SCZ                    | 8  | 111              | 1         | 0          |                                                                                                                                        |
| S00155   | M   | SCZ                    | 10 | 109              | 26        | ++         |                                                                                                                                        |
| S00157   | F   | SCZ                    | 10 | 82               | 9         | 0          |                                                                                                                                        |
| S00158   | M   | SCZ                    | 12 | 74               | 25        | ++         |                                                                                                                                        |
| S00160   | F   | SCZ                    | 12 | 95               | 1         | 0          |                                                                                                                                        |
| S00161   | F   | Schizoaffective        | 11 | 73               | 1         | 0          | De novo mutation in <i>SHANK3</i>                                                                                                      |
| S00162   | F   | SCZ                    | 10 | 85*              | 3         | 0          | Estimated premorbid full scale intelligence quotient (FSIQ) is 85 based on school reports and evaluations                              |
| S00164   | M   | SCZ                    | 9  | 100*             | 3         | 0          | Estimated premorbid FSIQ is 100 based on A/B grades in mainstream academic setting and based on school evaluations                     |
| S00165   | M   | SCZ                    | 12 | 115*             |           |            | Estimated premorbid FSIQ is 115 based on premorbid academic performance and premorbid Stanford Achievement Test                        |
| S00167   | M   | SCZ                    | 8  | 95               | 20        | ++         |                                                                                                                                        |
| S00168   | M   | SCZ                    | 12 | 98               | 8         | 0          |                                                                                                                                        |
| S00170   | M   | SCZ                    | 10 | 82               | 8         | 0          |                                                                                                                                        |
| S00171   | F   | SCZ                    | 9  | 75*              | 11        | 0          | Estimated FSIQ is 75 based on Stanford-Binet Composite Score of 81 as well as the below average to average results on additional tests |
| S00179   | M   | SCZ (paranoid)         | 16 | 125 <sup>†</sup> |           |            | Depression, highest school level achieved = 9                                                                                          |
| S00180   | F   | SCZ (paranoid)         | 20 |                  |           |            |                                                                                                                                        |
| S00181   | M   | SCZ (paranoid)         | 24 |                  |           |            |                                                                                                                                        |
| S00183   | M   | SCZ (paranoid)         | 15 |                  |           |            | Comorbid mental retardation, depression                                                                                                |
| S00184   | M   | SCZ (paranoid)         | 20 |                  |           |            |                                                                                                                                        |
| S00185   | M   | SCZ (paranoid)         | 24 |                  |           |            |                                                                                                                                        |
| S00187   | M   | SCZ                    | 17 |                  |           |            |                                                                                                                                        |
| S00189   | M   | SCZ                    | 17 |                  |           |            |                                                                                                                                        |
| S00190   | M   | SCZ                    | 21 |                  |           |            |                                                                                                                                        |
| S00191   | M   | SCZ (paranoid)         | 29 | 97 <sup>†</sup>  |           |            | Highest school level achieved = 13                                                                                                     |
| S00193   | M   | SCZ (undifferentiated) | 19 | 101 <sup>†</sup> |           |            | Comorbid mild mental retardation, highest school level achieved = 10                                                                   |
| S00200   | F   | Schizoaffective        | 20 |                  |           |            |                                                                                                                                        |
| S00201   | M   | SCZ                    |    |                  |           |            |                                                                                                                                        |
| S00203   | M   | Schizoaffective        | 13 |                  |           |            |                                                                                                                                        |
| S00204   | F   | SCZ (catatonic)        | 20 | 76               |           | +          |                                                                                                                                        |
| S00207   | M   | SCZ                    | 18 |                  |           |            |                                                                                                                                        |
| S00208   | F   | SCZ                    | 20 |                  |           |            |                                                                                                                                        |
| S00209   | M   | Schizoaffective        | 20 |                  |           |            |                                                                                                                                        |
| S00210   | M   | Schizoaffective        | 18 |                  |           |            |                                                                                                                                        |
| S00211   | F   | Schizoaffective        |    |                  |           |            |                                                                                                                                        |
| S00212   | M   | SCZ                    |    |                  |           |            |                                                                                                                                        |
| S00213   | M   | SCZ (disorganized)     | 15 | 89 <sup>†</sup>  |           |            | Highest school level achieved = 13                                                                                                     |
| S00219   | M   | SCZ                    | 26 |                  |           |            |                                                                                                                                        |
| S00220   | F   | SCZ                    |    |                  |           |            |                                                                                                                                        |
| S00223   | F   | SCZ                    | 21 |                  |           |            |                                                                                                                                        |
| S00224   | M   | SCZ                    |    |                  |           |            |                                                                                                                                        |
| S00231   | M   | SCZ                    |    |                  |           |            |                                                                                                                                        |
| S00233   | M   | SCZ                    | 21 |                  |           |            |                                                                                                                                        |
| S00235   | F   | Schizoaffective        |    |                  |           |            |                                                                                                                                        |
| S00242   | M   | SCZ                    |    |                  |           |            |                                                                                                                                        |

Table S1. Cont.

| Subjects | Sex | Diagnosis                       | AO    | IQ              | ASQ score | ASD traits | Notes                                                        |
|----------|-----|---------------------------------|-------|-----------------|-----------|------------|--------------------------------------------------------------|
| S00245   | F   | Schizoaffective                 | 15    |                 |           |            |                                                              |
| S00246   | F   | SCZ                             |       |                 |           |            |                                                              |
| S00252   | M   | SCZ (undifferentiated)          | 30    | ND              |           | 0          | Mental retardation ruled out, no ASD traits according to ASQ |
| S00255   | M   | SCZ                             | 20    |                 |           |            |                                                              |
| S00257   | M   | Schizoaffective                 | 15    |                 |           |            |                                                              |
| S00259   | F   | SCZ (undifferentiated)          | 16    | 51 <sup>†</sup> |           |            | Highest school level achieved = 10                           |
| S00261   | M   | SCZ (paranoid)                  | 16    | 96 <sup>†</sup> |           |            | Highest school level achieved = 12                           |
| S00263   | M   | Schizoaffective                 | 18    |                 |           |            |                                                              |
| S00267   | M   | Schizoaffective                 | 19    |                 |           |            |                                                              |
| S00270   | M   | SCZ                             |       |                 |           |            |                                                              |
| S00271   | F   | SCZ                             | 17    |                 |           |            |                                                              |
| S00272   | M   | SCZ                             | 18    |                 |           |            |                                                              |
| S00274   | M   | SCZ                             | 22    |                 |           |            |                                                              |
| S00276   | M   | SCZ                             | 17–18 |                 |           |            |                                                              |
| S00278   | F   | SCZ                             |       |                 |           |            |                                                              |
| S00279   | M   | SCZ                             |       |                 |           |            |                                                              |
| S00281   | M   | Schizoaffective                 | 14    |                 |           |            |                                                              |
| S00282   | M   | SCZ                             | 14    |                 |           |            |                                                              |
| S00284   | M   | SCZ                             | 17    |                 |           |            |                                                              |
| S00285   | M   | Schizoaffective                 | 19    | 73              | ND        | 0          | De novo mutation in <i>SHANK3</i>                            |
| S02946   | M   | SCZ (paranoid)                  | 23    |                 |           |            |                                                              |
| S02947   | M   | SCZ (paranoid)                  | 18    |                 |           |            |                                                              |
| S02948   | M   | SCZ (undifferentiated)          | 18    |                 |           |            |                                                              |
| S02949   | F   | SCZ (residual)                  | 24    |                 |           |            |                                                              |
| S02950   | F   | SCZ (undifferentiated)          | 19    |                 |           |            |                                                              |
| S02951   | M   | SCZ (disorganized)              | 26    |                 |           |            |                                                              |
| S02952   | M   | SCZ (paranoid)                  | 24    |                 |           |            |                                                              |
| S02953   | M   | SCZ (residual)                  | 16    |                 |           |            |                                                              |
| S02954   | M   | SCZ (paranoid)                  | 19    |                 |           |            | Epilepsy                                                     |
| S02955   | M   | SCZ (undifferentiated)          | 22    |                 |           |            |                                                              |
| S02956   | M   | SCZ (residual)                  | 19    |                 |           |            |                                                              |
| S02957   | F   | SCZ (paranoid)                  | 24    |                 |           |            |                                                              |
| S02958   | M   | SCZ (paranoid)                  | 20    |                 |           |            |                                                              |
| S02959   | F   | SCZ (disorganized)              | 17    |                 |           |            |                                                              |
| S02960   | F   | SCZ (paranoid)                  | 24    |                 |           |            |                                                              |
| S02962   | M   | SCZ (paranoid)                  | 19    |                 |           |            |                                                              |
| S02963   | M   | SCZ (paranoid)                  | 23    |                 |           |            |                                                              |
| S02964   | M   | SCZ                             |       |                 |           |            |                                                              |
| S02965   | M   | SCZ                             |       |                 |           |            |                                                              |
| S02966   | M   | SCZ                             |       |                 |           |            |                                                              |
| S02967   | F   | SCZ                             |       |                 |           |            |                                                              |
| S02968   | F   | SCZ (paranoid)                  |       |                 |           |            |                                                              |
| S02969   | M   | SCZ (paranoid)                  |       |                 |           |            |                                                              |
| S02970   | M   | SCZ (paranoid)                  |       |                 |           |            |                                                              |
| S02971   | F   | SCZ (paranoid)                  |       |                 |           |            |                                                              |
| S02972   | F   | SCZ (undifferentiated)          |       |                 |           |            |                                                              |
| S02973   | M   | SCZ (paranoid)                  |       |                 |           |            |                                                              |
| S02974   | M   | SCZ (disorganized)              |       |                 |           |            |                                                              |
| S02975   | M   | SCZ (paranoid)                  | 26    |                 |           |            |                                                              |
| S02976   | M   | SCZ (paranoid)                  | 24    |                 |           |            |                                                              |
| S02978   | F   | SCZ (paranoid, schizoaffective) | 23    |                 |           |            |                                                              |
| S02980   | M   | SCZ                             | 2     |                 |           |            |                                                              |
| S02981   | M   | Schizoaffective                 | 21    |                 |           |            |                                                              |
| S02982   | M   | SCZ (paranoid)                  | 25    |                 |           |            |                                                              |
| S02983   | F   | Schizoaffective                 | 20    |                 |           |            |                                                              |
| S02988   | F   | SCZ                             |       |                 |           |            |                                                              |
| S02991   | M   | SCZ                             |       |                 |           |            |                                                              |
| S02992   | M   | SCZ                             |       |                 |           |            |                                                              |
| S02993   | F   | SCZ                             | 21    |                 |           |            |                                                              |
| S02994   | M   | SCZ                             | 17    |                 |           |            |                                                              |
| S02996   | M   | SCZ                             | 24    |                 |           |            |                                                              |



**Table S1. Cont.**

| Subjects | Sex | Diagnosis              | AO | IQ | ASQ score | ASD traits | Notes |
|----------|-----|------------------------|----|----|-----------|------------|-------|
| S05632   | M   | SCZ (undifferentiated) | 18 |    |           |            |       |
| S05633   | M   | SCZ (chronic)          | 21 |    |           |            |       |
| S05634   | M   | SCZ (chronic)          | 28 |    |           | Depression |       |
| S05635   | F   | SCZ (paranoid)         | 22 |    |           |            |       |
| S05636   | M   | SCZ (undifferentiated) | 20 |    |           |            |       |
| S05637   | M   | SCZ (paranoid)         | 23 |    |           |            |       |
| S05638   | M   | SCZ (chronic)          | 18 |    |           | Epilepsy   |       |
| S05639   | M   | SCZ (paranoid)         | 20 |    |           |            |       |
| S05640   | M   | SCZ (paranoid)         | 20 |    |           |            |       |
| S05641   | M   | SCZ (undifferentiated) | 26 |    |           |            |       |
| S05642   | M   | SCZ (undifferentiated) | 19 |    |           |            |       |
| S05643   | M   | SCZ (paranoid)         | 22 |    |           |            |       |
| S05644   | F   | SCZ (undifferentiated) | 20 |    |           |            |       |
| S05645   | M   | SCZ (chronic)          | 18 |    |           |            |       |
| S05648   | M   | SCZ (paranoid)         | 32 |    |           |            |       |
| S05649   | M   | SCZ (undifferentiated) | 20 |    |           |            |       |
| S05650   | M   | SCZ (paranoid)         | 26 |    |           |            |       |
| S05651   | M   | SCZ (paranoid)         | 26 |    |           |            |       |
| S05652   | F   | SCZ (residual)         | 20 |    |           |            |       |
| S05653   | F   | SCZ (chronic)          | 21 |    |           |            |       |
| S05658   | M   | SCZ                    | 19 |    |           |            |       |
| S05662   | M   | SCZ (paranoid)         | 23 |    |           |            |       |
| S05666   | M   | SCZ (paranoid)         | 21 |    |           |            |       |

AO, age at onset; ASD, autism spectrum disorder; ASQ, Autism Screening Questionnaire (score > 15 = autism); F, female; IQ, Intellectual Quotient; M, male; ND, not determined; SCZ, schizophrenia.

\*These subjects had no formal premorbid IQ and no valid IQ score at admission but had documented premorbid school/academic functioning.

<sup>†</sup>Verbal IQ.

**Table S2. Segregation of microsatellite markers in pedigrees 419 and 56**

|             | PED 419 |         |         |         |        | PED 56 |         |         |        |
|-------------|---------|---------|---------|---------|--------|--------|---------|---------|--------|
|             | Father  | Proband | Brother | Brother | Mother | Father | Proband | Brother | Mother |
|             | I-1     | II-1    | II-2    | II-3    | I-2    | I-1    | II-1    | II-2    | I-2    |
| D3S1754     | 5,6     | 5,7     | 6,7     | 6,7     | 7,9    | 7,8    | 8,8     | 8,8     | 7,8    |
| D4S3351     | 4,4     | 4,13    | 4,13    | 4,13    | 4,13   | 3,8    | 6,8     | 6,8     | 4,6    |
| D6S1043     | 2,3     | 2,6     | 3,6     | 3,6     | 1,6    | 2,3    | 2,3     | 2,3     | 2,3    |
| D8S1179     | 6,8     | 6,6     | 4,8     | 6,6     | 4,6    | 6,7    | 5,7     | 5,7     | 5,6    |
| D15S659     | 2,6     | 2,1     | 2,4     | 2,1     | 4,1    | 2,7    | 1,7     | 1,7     | 1,1    |
| D14S63      | 4,5     | 4,5     | 4,6     | 4,4     | 4,6    | 1,4    | 1,4     | 1,4     | 4,4    |
| D7S531      | 4,6     | 4,4     | 4,4     | 2,4     | 2,4    | 2,2    | 2,3     | 2,4     | 3,4    |
| D11S904     | 4,7     | 4,4     | 4,4     | 4,7     | 4,5    | 2,4    | 2,6     | 4,6     | 2,6    |
| D19S215     | 2,6     | 2,6     | 1,6     | 1,2     | 1,2    | 2,6    | 2,6     | 1,2     | 1,2    |
| D15S533     | 5,5     | 1,5     | 1,5     | 1,5     | 1,1    | 5,6    | 5,6     | 5,6     | 2,6    |
| D2S1327     | 4,4     | 4,4     | 1,4     | 1,4     | 1,4    | 1,4    | 1,4     | 1,4     | 4,4    |
| D9S1118     | 6,7     | 6,6     | 6,6     | 6,7     | 6,8    | 2,6    | 6,6     | 1,6     | 1,6    |
| D10S677     | 2,5     | 5,6     | 2,6     | 4,5     | 4,6    | 4,4    | 4,5     | 3,4     | 3,5    |
| D11S1984    | 5,7     | 5,7     | 5,5     | 5,7     | 5,5    | 3,7    | 3,5     | 5,7     | 5,5    |
| D12S1294    | 3,6     | 3,3     | 3,3     | 3,3     | 3,3    | 5,8    | 4,8     | 5,8     | 4,5    |
| D14S587     | 2,6     | 5,6     | 2,5     | 2,2     | 2,5    | 2,7    | 2,8     | 6,7     | 6,8    |
| D16S748     | 1,1     | 1,1     | 1,2     | 1,1     | 1,2    | 6,6    | 2,6     | 2,6     | 2,2    |
| D17S2196    | ND      | ND      | ND      | ND      | ND     | 2,6    | 6,6     | ND      | 6,7    |
| G00111_M1-4 | 1,2     | 1,1     | 1,1     | 1,3     | 1,3    | 2,4    | 1,2     | 2,3     | 1,3    |
| G00111_M2-3 | 2,2     | 1,2     | 1,2     | 2,3     | 1,3    | 1,1    | 1,1     | 1,3     | 1,3    |
| G00111_M3-1 | 1,2     | 1,2     | 1,2     | 1,2     | 1,1    | 2,2    | 1,2     | 1,2     | 1,1    |
| G00111_M4-1 | 1,2     | 1,2     | 1,2     | 1,1     | 1,2    | 1,3    | 1,2     | 1,2     | 2,2    |
| G00111_M5_2 | 1,2     | 1,1     | 1,1     | 1,3     | 1,3    | NA     | NA      | NA      | NA     |
| G00111_M6-3 | 1,2     | 1,2     | 1,2     | 1,1     | 1,2    | NA     | NA      | NA      | NA     |
| G00111_M7-1 | 1,1     | 1,3     | 1,3     | 1,2     | 2,3    | 2,3    | 2,3     | 1,2     | 1,3    |

NA, not applicable; ND, not determined.

**Table S3. List of *SHANK3* variants detected in our SCZ and CTL cohorts**

| Variant type                         | Variants            | mRNA nucleotide | Genomic position | Allele frequency SCZ ( <i>n</i> = 370) | Allele frequency CTL ( <i>n</i> = 570) | PolyPhen | SIFT | SNAP | Proband(s)                     |
|--------------------------------------|---------------------|-----------------|------------------|----------------------------------------|----------------------------------------|----------|------|------|--------------------------------|
| Variants observed in SCZ cohort only |                     |                 |                  |                                        |                                        |          |      |      |                                |
| Silent                               | S341S               | c.1023G > A     | 49469938         | 2                                      | 0                                      |          |      |      | S00233, S05631                 |
| Missense                             | H494Q               | c.1479C > G     | 49482990         | 1                                      | 0                                      | PD       | PT   | NA   | S00272                         |
| Missense                             | R536W               | c.1606C > T     | 49484091         | 1                                      | 0                                      | PD       | PD   | PD   | S00161 (PED 56)                |
| Silent                               | I631I               | c.1893C > T     | 49490153         | 1                                      | 0                                      |          |      |      | S00142                         |
| Silent                               | P681P               | c.2043C > G     | 49491379         | 1                                      | 0                                      |          |      |      | S00149                         |
| Missense                             | S952T               | c.2856G > C     | 49505982         | 1                                      | 0                                      | PT       | PD   | NA   | S02974                         |
| Missense                             | G1011V*             | c.3032G > T     | 49506159         | 1                                      | 0                                      | PD       | PD   | NA   | S05615                         |
| Silent                               | E1022E              | c.3066G > A     | 49506193         | 1                                      | 0                                      |          |      |      | S02969                         |
| Nonsense                             | R1117X              | c.3349C > T     | 49506476         | 1                                      | 0                                      |          |      |      | S00285 (PED 419)               |
| Missense                             | P1134H              | c.3401C > A     | 49506528         | 1                                      | 0                                      | PD       | PD   | PT   | S00167                         |
| Silent                               | A1160A              | c.3482T > C     | 49506607         | 1                                      | 0                                      |          |      |      | S03042                         |
| Silent                               | K1179K              | c.3558G > A     | 49506664         | 4                                      | 0                                      |          |      |      | S00263, S00233, S05635, S03014 |
| Variants observed in CTL cohort only |                     |                 |                  |                                        |                                        |          |      |      |                                |
| Silent                               | Y122Y               | c.366C > T      | 49463905         | 0                                      | 1                                      |          |      |      | S06581                         |
| Silent                               | S297S               | c.891C > T      | 49468639         | 0                                      | 1                                      |          |      |      | S06197                         |
| Silent                               | A737A               | c.2211C > T     | 49500287         | 0                                      | 3                                      |          |      |      | S06412, S06445, S06598         |
| Silent                               | S1293S              | c.3879C > T     | 49507006         | 0                                      | 1                                      |          |      |      | S06262                         |
| Missense                             | R1298K              | c.3893G > A     | 49507020         | 0                                      | 1                                      | PT       | PT   | PT   | S06436                         |
| Silent                               | S1338L              | c.4013C > T     | 49507140         | 0                                      | 1                                      |          |      |      | S06216                         |
| Missense                             | I1546V <sup>‡</sup> | c.4636A > G     | 49516046         | 0                                      | 1                                      | PT       | PT   | NA   | S06647                         |
| Silent                               | S1636S              | c.4908C > T     | 49516318         | 0                                      | 1                                      |          |      |      | S06442                         |
| Common variants                      |                     |                 |                  |                                        |                                        |          |      |      |                                |
| Missense                             | I245T               | c.734T > C      | 49464446         | 123                                    | 184                                    | PT       | PT   | PT   | >3                             |
| Missense                             | A721T               | c.2161G > A     | 49500237         | 9                                      | 16                                     | PT       | PD   | PT   | >3                             |
| Silent                               | P770P               | c.2313G > A     | 49501007         | 2                                      | 3                                      |          |      |      | >3                             |
| Silent                               | Y999Y               | c.2997C > T     | 49506124         | 5                                      | 14                                     |          |      |      | >3                             |
| Silent                               | S1121S              | c.3380C > T     | 49506490         | 3                                      | 1                                      |          |      |      | >3                             |
| Missense                             | V1333G <sup>†</sup> | c.3999T > G     | 49507125         | 1                                      | 2                                      | PD       | PT   | PT   | >3                             |
| Silent                               | P1649P              | c.4962C > T     | 49516357         | 2                                      | 2                                      |          |      |      | >3                             |
| Missense                             | P1654T <sup>§</sup> | c.4960C > A     | 49516370         | 1                                      | 4                                      | PD       | PT   | PT   | >3                             |

CTL, control; *n*, number of unrelated chromosomes tested; NA, not applicable; PD, predicted damaging; PT, predicted tolerated; SCZ, schizophrenia. cDNA sequence as described (1).

\*Present in ASD (2).

<sup>†</sup>Present in CTLs (2).

<sup>‡</sup>Present in ASD (3).

<sup>§</sup>Present in unaffected siblings of ASD and CTL (1, 2).

1. Moessner R, et al. (2007) Contribution of *SHANK3* mutations to autism spectrum disorder. *Am J Hum Genet* 81:1289–1297.

2. Durand CM, et al. (2007) Mutations in the gene encoding the synaptic scaffolding protein *SHANK3* are associated with autism spectrum disorders. *Nat Genet* 39:25–27.

3. Gauthier J, et al. (2009) Novel de novo *SHANK3* mutation in autistic patients. *Am J Med Genet B Neuropsychiatr Genet* 150B:421–424.

**Table S4. Variation within the *SHANK3* coding region. Substitutions were tabulated by comparing human and chimp (*Pan troglodytes*) orthologous DNA sequence alignments**

|                             | Synonymous variants | Nonsynonymous variants |
|-----------------------------|---------------------|------------------------|
| Interspecific substitutions | 16                  | 3                      |
| Intraspecific polymorphisms | 24                  | 3                      |

**Table S5. PCR primer pairs used to determine parental origin of the de novo mutations**

| Type              | Primer name | Amplicon size (bp) | Forward primer (5'-3')  | Reverse primer (5'-3')   |
|-------------------|-------------|--------------------|-------------------------|--------------------------|
| (TG) <sub>n</sub> | G0111_M1-4  | 210                | GACCCACGCCAGTCAT        | TTCATAGTTTCAATAAGCCACAA  |
| (TG) <sub>n</sub> | G0111_M2-3  | 229                | ACATTGAGGGTCTGGATACTG   | CCCCGCTGCACCCTCGTCA      |
| (TC) <sub>n</sub> | G0111_M3-1  | 278                | GGAACGGAGGAAAGCGGTCTGC  | TGGGGCACATGTTCCAGTTGG    |
| (CA) <sub>n</sub> | G0111_M4-2  | 266                | ATAGGCTCCCGGCTTCAGCACT  | CAATTTTGGCGGCAGGATTCAG   |
| (TG) <sub>n</sub> | G0111_M5-2  | 255                | GTTCTTGGGTCTCTGGCTCCTC  | TGGTGGCCCTCCACACTT       |
| (CA) <sub>n</sub> | G0111_M6-3  | 350                | TCAGGAGCCGAGGCAAGATAATC | CCTCCTGGGCTCAAGCTACTCTGC |
| (TG) <sub>n</sub> | G0111_M7-1  | 283                | CGCGCCGGCAAGTTCCTG      | TGTCCGCTCGCTGCACCCTGTA   |

**Table S6. Primer pairs used for screening of the *SHANK3* gene**

| Exon  | Amplicon name | Amplicon size (bp) | Forward primer (5'-3') | Reverse primer (5'-3')  |
|-------|---------------|--------------------|------------------------|-------------------------|
| 1     | G00111_001    | 325                | GCGTCCGTTCCCCGGCGCGA   | CCTCCGGAACCCGGCCGAA     |
| 2     | G00111_033    | 320                | GACCTGAGCTCAGAGCCCGCT  | CTGCCGTGCCCTTCACTGGTC   |
| 3     | G00111_003    | 233                | GGGTTTGTGCATGGACTC     | ACTGTGGTCAGCCCCAAG      |
| 4-5   | G00111_004    | 502                | AGGCTTGCCGGAGGAAG      | GCAGCCTCAGTATCCACACC    |
| 4-7   | G00111_034    | 1047               | GAGGAAGGCGGGTGATGTTCA  | AGTATATCCACACTCGGTGCA   |
| 8     | G00111_005    | 247                | GCGCATGTGCTGTTGTG      | CCTCCAGGGAAGAACCAAG     |
| 9     | G00111_006    | 234                | CTGGCGAGGCAAAGCTG      | GCCCCTTTATGTCACTACTG    |
| 10    | G00111_007    | 427                | TAACATCTGAAAGCCTGGG    | GCTCCTCTGGCTCAGGTC      |
| 11    | G00111_326    | 602                | CCCCGCATCGCTCCGTACCTA  | CCACATCGCAGGGCCTCCAATGG |
| 12    | G00111_009    | 275                | ACCTGCTCCTGAGGTGGG     | CCATGTGGATTAGACCAAG     |
| 13-14 | G00111_010    | 556                | GTGTGGGAGAGACTGGTG     | GAAGCTGAAGACATCCCTGAG   |
| 15-16 | G00111_011    | 508                | ACTCGGAGGTTGCTGTGTG    | ATGTGGGCTGAAGTCAAAG     |
| 17    | G00111_036    | 384                | ACCTGAACAAGATCCTGGCAC  | CACCCATTACCTCTGACCTG    |
| 18    | G00111_013    | 188                | GGTGGGAAATGAGTGTGG     | CTGGAACCTCCTCACACACC    |
| 19    | G00111_014    | 286                | GGTTGGGAGGACATGG       | CTCTCACCTCCGTCAAGAGG    |
| 20    | G00111_015    | 243                | CTCACCTCTGGCTTAGGAGG   | TGTCCTTCAAACCAAGTCC     |
| 21    | G00111_044    | 609                | GGTCCCAGGAACCTCTC      | ACCTGCAGCTGCTTACC       |
| 21    | G00111_017    | 676                | TATCCGAGCGGCAGAAAG     | GTGAGCTGGGGTCCAGG       |
| 21    | G00111_029    | 607                | CTACAGCCCTCCGCTC       | CTGCCACAGCCGCTGAC       |
| 21    | G00111_041    | 570                | CTCATCGTTGTGCACGC      | GGAGGTGTGGGTGTCAAGTG    |
| 21    | G00111_114    | 488                | CCAGGGCAGCTCAGAGG      | GGTCCCTGAAGGTCACCG      |
| 21    | G00111_119    | 520                | GGGAACTCACTGACACCCAC   | CAGGAGAGCCAGAGAACAGAC   |
| 24    | G00111_039    | 600                | CCGTAGGATCCCACCTTTA    | GCCTAGGTGGATGCTCTCCAG   |
| 24    | G00111_040    | 460                | CTTCGTGGTGGCAGCGTGAG   | ACAGCAAACAGGACGATTCA    |

Exons 22 and 23 were not tested because they are not expressed in isoforms found in brain tissue.
